# Supplementary material for: Polysulfone Membranes Doped with Human Neutrophil Elastase Inhibitors: Assessment of Bioactivity and Biocompatibility
Source: MDPI journal article supplement (doi:10.3390/membranes13010089), 2023-01-10
Supplement: s1 [file s1]

**Table S3 – Complement to Figure 3:** For each time point, the comparison between D4L-1-PSU, D4L-2-PSU, and Sivelestat-PSU mem-branes within each concentration, on the left side, the comparison between the concentration groups within each HNEI-PSU biomaterial (one-way ANOVA test); in the middle, the effect of the interaction between concentration of HNEI initial solution and type of HNEI-PSU membrane (two-way ANOVA test); on the right, according to HNEIs' incubations with plasma (top) or diluted plasma (bottom).

| <i>Plasma</i>      | <i>D4L-1-PSU vs. D4L-2PSU vs. Sivelestat-PSU, p</i> |           |           |            |            |             | <i>5 vs. 25 vs. 50 vs. 250x vs. 500 vs. 1000, p</i> |                  |                       |
|--------------------|-----------------------------------------------------|-----------|-----------|------------|------------|-------------|-----------------------------------------------------|------------------|-----------------------|
| <i>Time (min.)</i> | <b>5</b>                                            | <b>25</b> | <b>50</b> | <b>250</b> | <b>500</b> | <b>1000</b> | <b>D4L-1-PSU</b>                                    | <b>D4L-2-PSU</b> | <b>Sivelestat-PSU</b> |
| <b>0</b>           | 0.446                                               | 0.148     | 0.224     | <0.001     | <0.001     | <0.001      | <0.001                                              | 0.084            | 0.533                 |
| <b>180</b>         | 0.020                                               | 0.103     | <0.001    | 0.010      | <0.001     | <0.001      | <0.001                                              | 0.014            | 0.763                 |

  

| <i>HEPES</i>       | <i>D4L-1 vs. D4L-2 vs. Sivelestat, p</i> |           |           |            |            |             | <i>100x vs. 10x vs. 1x vs. 0.1x vs. 0.01x IC50, p</i> |              |                   |
|--------------------|------------------------------------------|-----------|-----------|------------|------------|-------------|-------------------------------------------------------|--------------|-------------------|
| <i>Time (min.)</i> | <b>5</b>                                 | <b>25</b> | <b>50</b> | <b>250</b> | <b>500</b> | <b>1000</b> | <b>D4L-1</b>                                          | <b>D4L-2</b> | <b>Sivelestat</b> |
| <b>0</b>           | 0.218                                    | 0.344     | 0.147     | 0.021      | 0.005      | <0.001      | 0.161                                                 | <0.001       | 0.054             |
| <b>180</b>         | 0.023                                    | 0.125     | 0.028     | <0.001     | <0.001     | 0.507       | 0.002                                                 | 0.042        | <0.001            |

PSU, polysulfone.  $p < 0.05$  was considered statistically significant (ANOVA one-way test).
