# Supplementary material for: Polysulfone Membranes Doped with Human Neutrophil Elastase Inhibitors: Assessment of Bioactivity and Biocompatibility
Source: MDPI journal article supplement (doi:10.3390/membranes13010089), 2023-01-10
Supplement: s1 [file s1]

**Table S2 – Complement to Figure 1:** For each time point, the comparison between D4L-1, D4L-2, and Sivelestat groups within each concentration, on the left side; the comparison between the concentration groups within each HNEI (one-way ANOVA test), in the middle; and the effect of the interaction between concentration and type of HNEI (two-way ANOVA test), on the right, according to HNEIs' incubations with plasma (top) or diluted plasma (bottom).

| <i>Plasma</i>      | <i>D4L-1 vs. D4L-2 vs. Sivelestat, p</i> |                 |                |                  | <i>100x vs. 10x vs. 1x vs. 0.1x vs. 0.1x IC50s, p</i> |              |                   |
|--------------------|------------------------------------------|-----------------|----------------|------------------|-------------------------------------------------------|--------------|-------------------|
| <i>Time (min.)</i> | <b>100x IC50</b>                         | <b>10x IC50</b> | <b>1x IC50</b> | <b>0.1x IC50</b> | <b>D4L-1</b>                                          | <b>D4L-2</b> | <b>Sivelestat</b> |
| <b>0</b>           | <0.001                                   | <0.001          | 0.153          | 0.347            | <0.001                                                | 0.033        | 0.534             |
| <b>15</b>          | <0.001                                   | <0.001          | 0.132          | 0.141            | <0.001                                                | <0.001       | 0.071             |
| <b>30</b>          | <0.001                                   | 0.001           | 0.338          | 0.639            | <0.001                                                | 0.012        | 0.375             |
| <b>60</b>          | <0.001                                   | 0.078           | 0.144          | 0.641            | <0.001                                                | 0.040        | 0.002             |
| <b>180</b>         | 0.572                                    | 0.088           | 0.135          | 0.611            | 0.064                                                 | 0.026        | 0.001             |

  

| <i>Diluted Plasma</i> | <i>D4L-1 vs. D4L-2 vs. Sivelestat, p</i> |                 |                |                  | <i>100x vs. 10x vs. 1x vs. 0.1x vs. 0.01x IC50, p</i> |              |                   |
|-----------------------|------------------------------------------|-----------------|----------------|------------------|-------------------------------------------------------|--------------|-------------------|
| <i>Time (min.)</i>    | <b>100x IC50</b>                         | <b>10x IC50</b> | <b>1x IC50</b> | <b>0.1x IC50</b> | <b>D4L-1</b>                                          | <b>D4L-2</b> | <b>Sivelestat</b> |
| <b>0</b>              | <0.001                                   | <0.001          | 0.041          | 0.964            | <0.001                                                | <0.001       | 0.808             |
| <b>15</b>             | <0.001                                   | <0.001          | 0.030          | 0.548            | <0.001                                                | <0.001       | 0.190             |
| <b>30</b>             | <0.001                                   | <0.001          | 0.028          | 0.309            | <0.001                                                | <0.001       | 0.002             |
| <b>60</b>             | <0.001                                   | 0.001           | 0.040          | 0.146            | <0.001                                                | <0.001       | 0.017             |
| <b>180</b>            | 0.037                                    | 0.645           | 0.630          | 0.954            | <0.001                                                | 0.001        | 0.276             |

IC50, half maximal inhibitory concentration.  $p < 0.05$  was considered statistically significant (ANOVA one-way test).
