# Supplementary material for: Polysulfone Membranes Doped with Human Neutrophil Elastase Inhibitors: Assessment of Bioactivity and Biocompatibility
Source: MDPI journal article supplement (doi:10.3390/membranes13010089), 2023-01-10
Supplement: s1 [file s1]

**Table S1: Details of the MRM conditions applied in the UHPLC-MS/MS analysis.**

| Compound   | [M-H]- | MRM1 | MRM2 | Cone Voltage (V) | Collision Energy (eV) |
|------------|--------|------|------|------------------|-----------------------|
| D4L-1      | 423    | 150  | 246  | 40               | 20                    |
| D4L-2      | 260    | 216  | 188  | 30               | 20                    |
| Sivelestat | 433    | 157  | 389  | 40               | 20                    |
