# Supplementary material for: Polysulfone Membranes Doped with Human Neutrophil Elastase Inhibitors: Assessment of Bioactivity and Biocompatibility
Source: Membranes (Basel). 2023 Jan 10;13(1):89. doi: 10.3390/membranes13010089 (PMC9861744; doi:10.3390/membranes13010089)
Supplement: Supplementary file 1 [file membranes-13-00089-s001.zip]

Archive with 11 entries (11 files):
- Figure S1.tif
- Figure S2.tif
- Figure S3.tif
- Figure S4.tif
- Figure S5.tif
- Figure S6.tif
- Figure S7.tif
- Figure S8.tif
- Table S1.pdf
- Table S2.pdf
- Table S3.pdf
